# Supplementary material
Source: HighWire-hosted journal article supplement (http://dmd.aspetjournals.org/highwire/filestream/66695/field_highwire_adjunct_files/0/Supplemental_71993.pdf)
Supplement: Supplemental_71993.pdf [file Supplemental_71993.pdf]

## **Supplemental Information**

### **Identification and characterization of CINPA1 metabolites facilitates structure-activity studies of the constitutive androstane receptor**

Milu T. Cherian, Lei Yang, Sergio C. Chai, Wenwei Lin, and Taosheng Chen

Department of Chemical Biology & Therapeutics, St. Jude Children's Research Hospital,  
Memphis, Tennessee, United States

### **Drug Metabolism and Disposition**

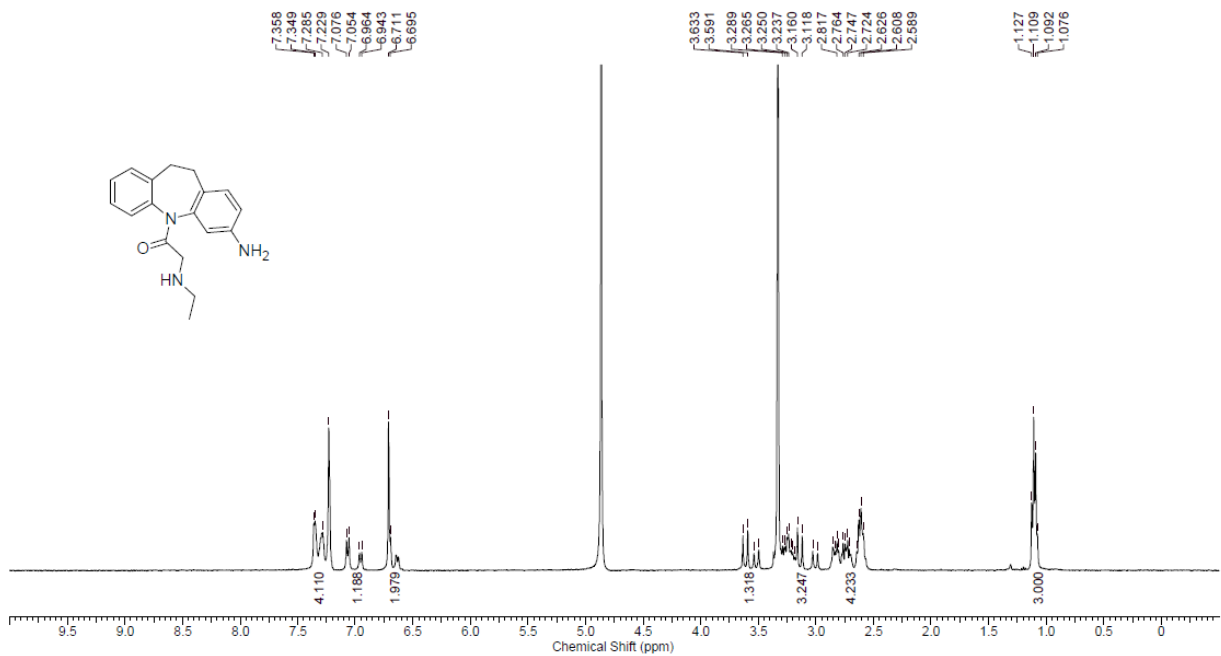

### Supplemental Figure 1: <sup>1</sup>H NMR spectrum of Met2.

The <sup>1</sup>H NMR spectrum was recorded on a Bruker UltraShield 400 PLUS system. The chemical shift values are expressed in ppm relative to tetramethylsilane as the internal standard.

20150312\_LTC\_MET2-02 250 (1.085)

1: TOF MS ES+  
1.04e6

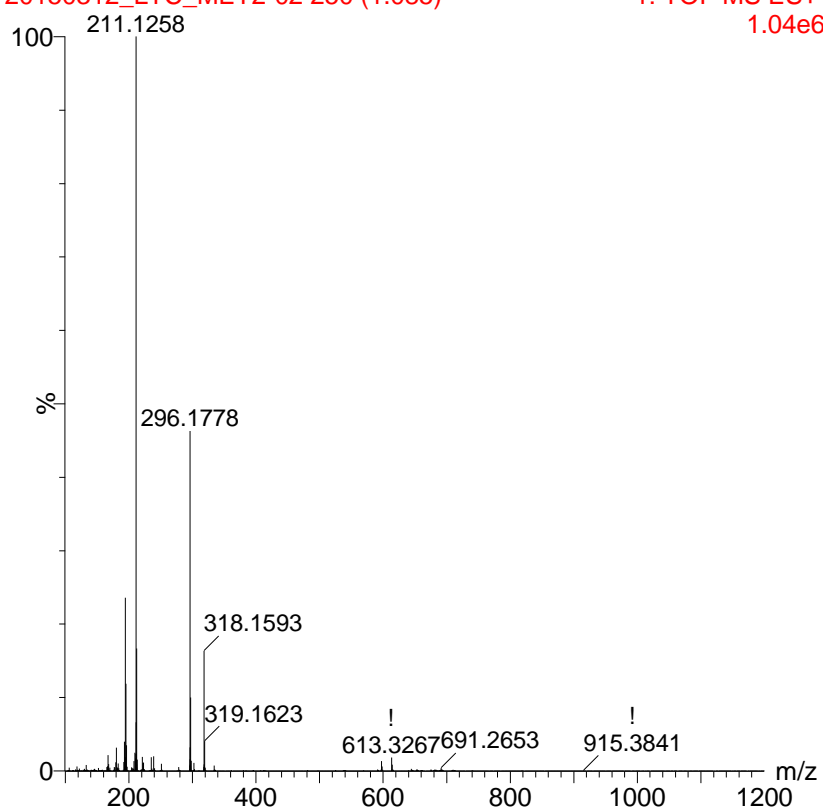

**Supplemental Figure 2: ESI-TOF HRMS of Met2.**

The ESI-TOF HRMS of Met2 was recorded using Waters Acquity UPLC-Xevo G2 QTOF system.

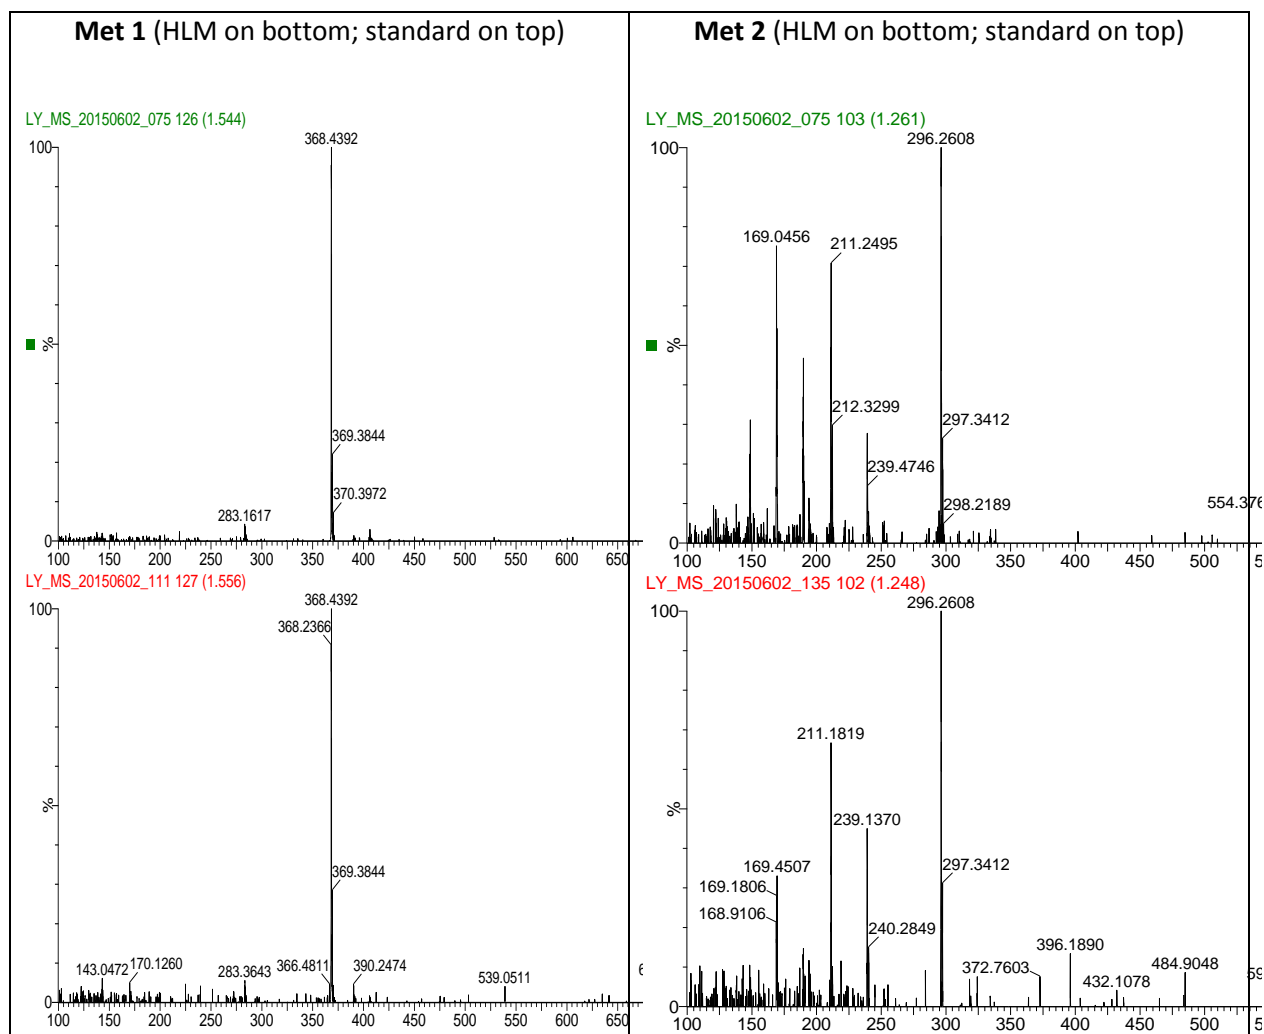

**Supplemental Figure 3: MS spectra of the metabolites identified in HLM compared to the analytic standards of Met1 and Met2.**

The MS spectra of the metabolites identified from HLM lysates were compared to analytic standards of Met1 (obtained from ChemBridge Corp., San Diego, CA; Catalog # 5214995) and Met2 (synthesized as described in Materials and Methods). MS was performed using a Waters ACQUITY-UPLC-SQD-UV system.

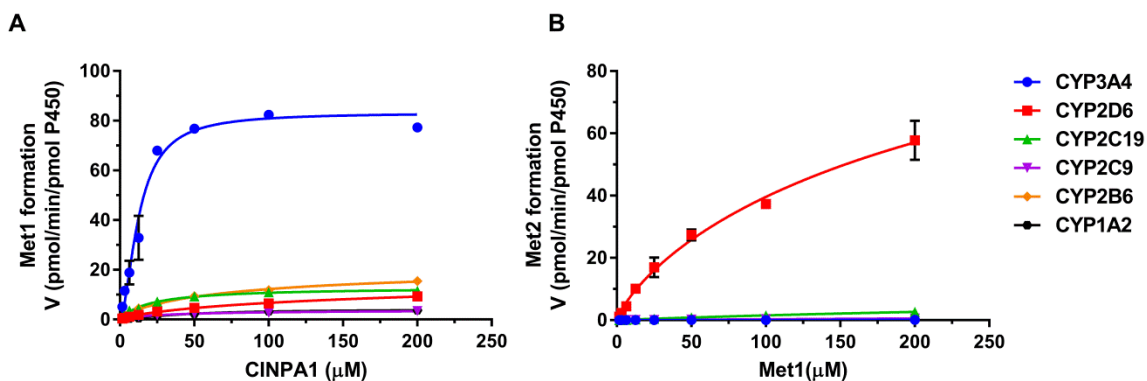

**Supplemental Figure 4: Kinetics of metabolite formation from CINPA1 or Met1 in recombinant human P450s.**

An increasing concentration of (A) CINPA1 or (B) Met1 (0–200  $\mu\text{M}$ ) was incubated with the indicated recombinant human cytochrome P450s and an NADPH regenerating system at 37°C for 30 min. The velocity of metabolite formation (pmol of product/min/pmol of P450) versus the substrate concentration was fitted to a Hill equation (see Materials and Methods section) to obtain the kinetic parameters for each enzyme, as represented in Table 3 of the main text. Each point represents the average  $\pm$  SD of triplicate reaction wells. Error bars smaller than the data points are not visible.

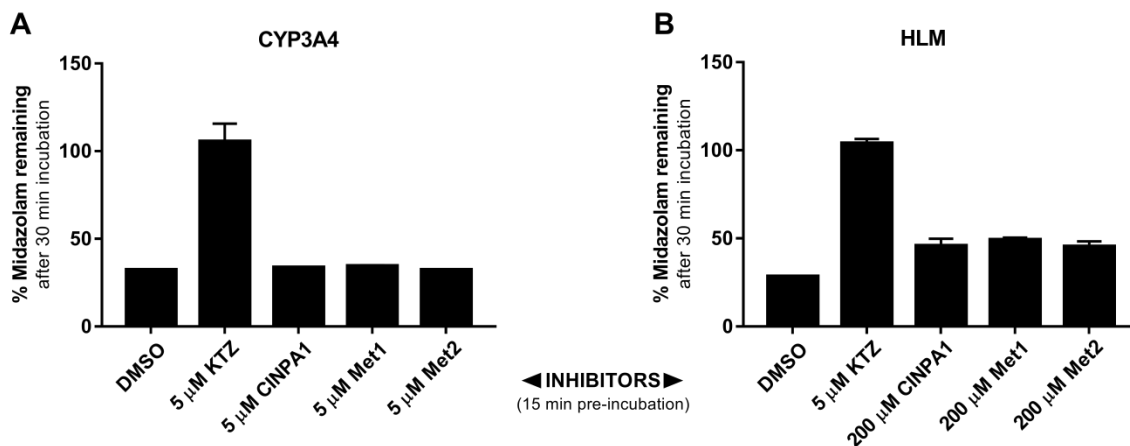

**Supplemental Figure 5: Metabolism of midazolam in human recombinant CYP3A4 or HLM in the presence of inhibitors.**

(A) CYP3A4 enzyme (41 pmol/ml) or (B) HLM (0.5 mg/ml) were preincubated with DMSO (control), CYP3A4-specific inhibitor ketoconazole (KTZ), CINPA1, Met1, or Met2 and an NADPH regenerating system at 37°C for 15 min. 5  $\mu$ M of midazolam was added as substrate to reaction mixtures, which were then incubated for a further 30 min at 37°C. All reactions were terminated with ACN and analyzed by LC/MS. The enzyme activity was calculated by measuring the amount of substrate remaining in the reaction wells after 30 min incubation at 37°C. Midazolam concentrations at 0 min (pre-incubated with DMSO) were set as “100% midazolam remaining”, and “% midazolam remaining” for each inhibitor after 30 min incubation at 37°C was calculated as percentage of the midazolam concentration at time 0. Each bar represents the average  $\pm$  SD of triplicate reaction wells. Some error bars are too small to be visible.
